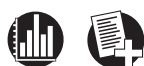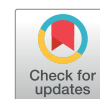

# Maternal Cardiac Changes in Women With Obesity and Gestational Diabetes Mellitus

Diabetes Care 2022;45:3007–3015 | <https://doi.org/10.2337/dc22-0401>

Sharmaine Thirunavukarasu,<sup>1</sup>  
Faiza Ansari,<sup>2</sup> Richard Cubbon,<sup>1</sup>  
Karen Forbes,<sup>1</sup> Chiara Bucciarelli-Ducci,<sup>3</sup>  
David E. Newby,<sup>4</sup> Marc R. Dweck,<sup>4</sup>  
Oliver J. Rider,<sup>5</sup> Ladislav Valkovič,<sup>5,6</sup>  
Christopher T. Rodgers,<sup>7</sup> Damian J. Tyler,<sup>5,8</sup>  
Amrit Chowdhary,<sup>1</sup> Nicholas Jex,<sup>1</sup>  
Sindhoora Kotha,<sup>1</sup> Lara Morley,<sup>1</sup> Hui Xue,<sup>9</sup>  
Peter Swoboda,<sup>1</sup> Peter Kellman,<sup>9</sup>  
John P. Greenwood,<sup>1</sup> Sven Plein,<sup>1</sup>  
Thomas Everett,<sup>2</sup> Eleanor Scott,<sup>1</sup> and  
Eylem Levelt<sup>1</sup>

## OBJECTIVE

We investigated if women with gestational diabetes mellitus (GDM) in the third trimester of pregnancy exhibit adverse cardiac alterations in myocardial energetics, function, or tissue characteristics.

## RESEARCH DESIGN AND METHODS

Thirty-eight healthy, pregnant women and 30 women with GDM were recruited. Participants underwent phosphorus MRS and cardiovascular magnetic resonance for assessment of myocardial energetics (phosphocreatine [PCr] to ATP ratio), tissue characteristics, biventricular volumes and ejection fractions, left ventricular (LV) mass, global longitudinal shortening (GLS), and mitral in-flow E-wave to A-wave ratio.

## RESULTS

Participants were matched for age, gestational age, and ethnicity. The following data are reported as mean  $\pm$  SD. The women with GDM had higher BMI ( $27 \pm 4$  vs.  $33 \pm 5$  kg/m<sup>2</sup>;  $P = 0.0001$ ) and systolic ( $115 \pm 11$  vs.  $121 \pm 13$  mmHg;  $P = 0.04$ ) and diastolic ( $72 \pm 7$  vs.  $76 \pm 9$  mmHg;  $P = 0.04$ ) blood pressures. There was no difference in N-terminal pro-brain natriuretic peptide concentrations between the groups. The women with GDM had lower myocardial PCr to ATP ratio ( $2.2 \pm 0.3$  vs.  $1.9 \pm 0.4$ ;  $P < 0.0001$ ), accompanied by lower LV end-diastolic volumes ( $76 \pm 12$  vs.  $67 \pm 11$  mL/m<sup>2</sup>;  $P = 0.002$ ) and higher LV mass ( $90 \pm 13$  vs.  $103 \pm 18$  g;  $P = 0.001$ ). Although ventricular ejection fractions were similar, the GLS was reduced in women with GDM ( $-20\% \pm 3\%$  vs.  $-18\% \pm 3\%$ ;  $P = 0.008$ ).

## CONCLUSIONS

Despite no prior diagnosis of diabetes, women with obesity and GDM manifest impaired myocardial contractility and higher LV mass, associated with reductions in myocardial energetics in late pregnancy compared with lean women with healthy pregnancy. These findings may aid our understanding of the long-term cardiovascular risks associated with GDM.

Gestational diabetes mellitus (GDM), defined as hyperglycemia with onset or first recognition during pregnancy that is below diagnostic thresholds for type 2 diabetes (T2D) (1), is increasing in prevalence, affecting 5% to 18% of all pregnancies worldwide, driven by the increasing burden of obesity among women of reproductive age (2,3). The diagnosis of GDM has long-term implications for maternal cardiovascular health, with up to a twofold higher cardiovascular disease (CVD) risk postpartum, including a greater risk of heart failure (hazard ratio [HR] 2.8 [95% CI

<sup>1</sup>Leeds Institute of Cardiovascular and Metabolic Medicine, University of Leeds, Leeds, U.K.

<sup>2</sup>Department of Fetal Medicine, Leeds General Infirmary, The Leeds Teaching Hospitals National Health Service Trust, Leeds, U.K.

<sup>3</sup>National Heart and Lung Institute, Imperial College, London, U.K.

<sup>4</sup>BHF Centre for Cardiovascular Science, University of Edinburgh, Edinburgh, U.K.

<sup>5</sup>University of Oxford Centre for Clinical Magnetic Resonance Research, Radcliffe Department of Medicine Cardiovascular Medicine, University of Oxford, Oxford, U.K.

<sup>6</sup>Department of Imaging Methods, Institute of Measurement Science, Slovak Academy of Sciences, Bratislava, Slovakia

<sup>7</sup>Wolfson Brain Imaging Centre, University of Cambridge, Cambridge, U.K.

<sup>8</sup>Department of Physiology, Anatomy and Genetics, University of Oxford, Oxford, U.K.

<sup>9</sup>National Heart, Lung, and Blood Institute, National Institutes of Health, Department of Health and Human Services, Bethesda, MD

Corresponding author: Eylem Levelt, e.levelt@leeds.ac.uk

Received 27 February 2022 and accepted 25 July 2022

This article contains supplementary material online at <https://doi.org/10.2337/figshare.20415726>.

© 2022 by the American Diabetes Association. Readers may use this article as long as the work is properly cited, the use is educational and not for profit, and the work is not altered. More information is available at <https://www.diabetesjournals.org/journals/pages/license>.

See accompanying article, p. 2820.

2.25–3.48]), stroke (HR 1.77 [95% CI 1.53–2.04]), and ischemic heart disease (HR 2.61 [95% CI 2.25–3.48]) in later life compared with women without a history of GDM (4–7). Moreover, women with a history of GDM have an up to sevenfold increased risk of developing T2D later in life (8). A recent meta-analysis suggested that women with a history of GDM have double the risk of major cardiovascular events compared with women with uncomplicated pregnancies, irrespective of a T2D diagnosis later in life (4). In a population-based study of parous women, the estimated proportion of CVD risk attributable to subsequent T2D in women with GDM was 23% (7).

The metabolic abnormalities underlying GDM include insulin resistance and pancreatic  $\beta$ -cell defects (9). Normal pregnancy requires maternal hemodynamic and metabolic adaptations to meet the increasing demands of the developing fetus (10). The hemodynamic changes include hyperdynamic circulation, systemic vasodilatation, increased filling capacity of the vasculature, and volume expansion (10). However, a recent study has shown maternal hemodynamic maladaptation to pregnancy in women with GDM, including lower cardiac output and stroke volume, and higher total vascular resistance (11).

To meet the energy needs of pregnancy, hepatic glucose production increases by 30% in healthy pregnant (HP) women by the end of gestation, and peripheral insulin sensitivity decreases by  $\sim$ 50% (12). Although there is a twofold to threefold increase in insulin secretion in women with normal glucose tolerance in response to the decreased insulin sensitivity, in women who were normoglycemic before pregnancy but went to develop GDM in late gestation, the  $\beta$ -cell insulin secretion was unable to compensate for pregnancy-induced insulin resistance, resulting in hyperglycemia (12).

Maternal inability to adapt to these metabolic and hemodynamic changes can expose underlying, previously silent pathology, leading to appreciation of pregnancy as “nature’s stress test” (13). Despite being the most prevalent metabolic disorder during pregnancy, the impact of GDM on maternal myocardial energetics has not been assessed previously, to our knowledge. Myocardial energy depletion is a common feature of metabolic disorders and compromised cardiac energy production is an

important contributor to most forms of heart disease (14).

Phosphorus MRS ( $^{31}\text{P}$ -MRS) reveals the biochemistry of ATP, ADP, and phosphocreatine (PCr), which are critical to the supply of energy for contractile work in the myocardium (15). The relative concentration of PCr to ATP (PCr/ATP) is a marker of the myocardium’s ability to convert substrate into ATP for active processes and is a sensitive index of the energetic state of the myocardium (Supplementary Fig. 1). Myocardial energetic compromise, indicated by decreased PCr/ATP, is a predictor of mortality (16) and linked to contractile dysfunction (16,17). The effects of gestational metabolic and hemodynamic alterations on the myocardial energetic state can be assessed noninvasively by  $^{31}\text{P}$ -MRS without the need for ionizing radiation or contrast exposure.

Moreover, cardiovascular magnetic resonance (CMR) allows comprehensive evaluation of myocardial structure, function, strain, and tissue characteristics, with excellent reproducibility. CMR parametric mapping methods (such as T1 and T2 mapping) are quantitative techniques that provide a pixel-by-pixel representation of numeric T1 or T2 properties. These techniques provide information on myocardial tissue type and composition without the need for contrast agents (18).

CMR, therefore, provides insight into cardiovascular physiology, and noncontrast CMR studies can be safely performed during pregnancy (19–22). Using CMR and  $^{31}\text{P}$ -MRS in the third trimester, we investigated the effect of pregnancy-associated cardiometabolic stresses on maternal myocardial energetics, structure, function, or tissue characteristics in women with pregnancies complicated by GDM.

## RESEARCH DESIGN AND METHODS

This single-center, observational, case-control study complied with the Declaration of Helsinki. It was approved by the National Research Ethics Committee (no. REC20/NE/0117), and informed written consent was obtained from each participant.

### Participants

A total of 68 participants ( $n = 38$  pregnant women with an uncomplicated

pregnancy and  $n = 30$  pregnant women with a diagnosis of GDM) were recruited in the study (Fig. 1). The pregnant participants were recruited via the Leeds Teaching Hospitals National Health Service Trust antenatal clinics attendance register and GDM clinics.

### Inclusion and Exclusion Criteria

Participants with ongoing pregnancy at 26–38 weeks’ gestation and who were  $>18$  years old were recruited. Recruitment for both groups was restricted to singleton first pregnancies. Women with a diagnosis of preeclampsia, antenatally small-for-gestational-age babies at week 33 transabdominal ultrasound ( $<10$ th percentile for estimated fetal weight) or any other adverse pregnancy outcomes; known cardiovascular problems (congenital or acquired heart disease); contraindications to CMR (e.g., pacemaker, cranial aneurysm clips, metallic ocular foreign bodies, severe claustrophobia); medical conditions that could affect cardiac function, including severe anemia, maternal diabetes (type 1 or type 2), chronic renal disease, chronic hypertension, liver disease, and former or current smokers were excluded. Ethnicity group was self-reported by participants.

The presence of preexisting diabetes was checked on electronic health care records at the prescreening stage. The absence of preexisting diabetes was then confirmed with the participants during the research visit.

### Oral Glucose Tolerance Test

Diagnosis of GDM was confirmed by a 75 g oral glucose tolerance test (OGTT) in all participants in the GDM group at the antenatal clinics using the U.K. National Institute for Health and Care Excellence guideline criteria for GDM of fasting glucose  $\geq 5.6$  mmol/L ( $\geq 100.8$  mg/dL) and/or 2 h glucose  $\geq 7.8$  mmol/L ( $\geq 140.4$  mg/dL) after intake of 75 g of oral glucose at  $\sim 26$  weeks’ gestation (23).

### Anthropometric Measurements

All women had height and weight recorded and BMI calculated at the booking visit performed at  $\sim 8$ th gestational week in antenatal clinics. Brachial artery blood pressure (BP) was recorded after an initial 5 min rest as an average of three sitting measurements taken over

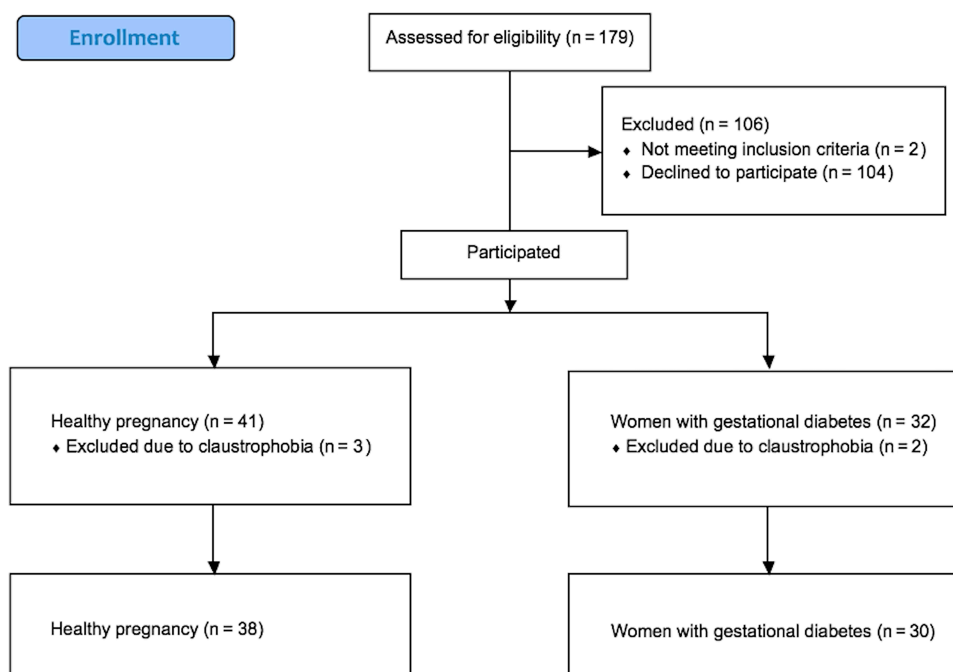

**Figure 1**—Consolidated Standards of Reporting Trials flow diagram of the recruitment pathway for study participants with HP and those with GDM.

10 min (DINAMAP-1846-SX, Critikon Corp.) using the appropriate cuff size based on the mid-arm circumference. These assessments were then repeated during the research CMR scan visit performed during the third trimester. A standard 12 lead electrocardiogram (ECG) was performed in all participants on the same day as the CMR. A venous blood sample was taken for assessments of full blood cell count, estimated glomerular filtration rate (eGFR), liver function, glycated hemoglobin (HbA<sub>1c</sub>), lipid profile (concentrations of triglycerides and HDL, LDL, and total cholesterol concentrations) and N-terminal prohormone B-type natriuretic peptide (NT-proBNP) also on the same day as the CMR. Given the pregnant status of the participants, a flexible approach to blood tests were used, and participants were requested to fast for 4 h prior to research visits per the recommendations of the local patient and public involvement group at the stage of study design.

### <sup>31</sup>P-MRS

<sup>31</sup>P-MRS was performed to obtain the PCr/ATP ratio from a voxel placed in the midventricular septum, with the participants lying supine, and in the isocenter of the magnet of a 3.0 Tesla MR system (Prisma; Siemens, Erlangen, Germany), a <sup>31</sup>P transmitter/receiver cardiac coil

(Rapid Biomedical GmbH, Rimpar, Germany) was placed over the participant's heart. <sup>31</sup>P-MRS data were acquired with a nongated, three-dimensional, acquisition-weighted chemical shift imaging sequence, as previously described (24).

### Cardiovascular MRI

All scans were performed on a 3.0 Tesla MR system (Prisma; Siemens) and all participants underwent cardiac MRI scans. The CMR protocol (Fig. 2) consisted of cine imaging, velocity-encoded mitral in-flow imaging, native T1 mapping, and T2 mapping.

To capture cross-sectional mitral valve (MV) flow, velocity-encoded mitral in-flow imaging was planned from an acquisition plane placed at the position of the MV at end systole. Velocity sensitivity was set at 200 cm/s. The phase-contrast images were acquired using retrospective ECG gating, using established methods (25).

Native T1 maps were acquired in three short-axis slices using a breath-held, modified look-locker inversion recovery acquisition, as previously described (24). T2 maps were acquired from the matching three short-axis positions to native T1 mapping using a T2-prepared true fast imaging with steady-state precession pulse sequence to produce single-shot T2-prepared images, each with

different T2 preparation times, as previously described (26).

### Quantitative Imaging Data Analysis

All <sup>31</sup>P-MRS analyses were performed off-line by one author (S.T.) using the OXSA toolbox as previously described (27). CMR postprocessing analysis using cvi42 software (Circle Cardiovascular Imaging, Calgary, Canada) was performed by one author (S.T.) offline and blinded to all participant details after completion of the study, and scan contours were subsequently reviewed another author (E.L.) who was also blinded to participant details.

Global longitudinal shortening (GLS) data were derived from horizontal and vertical long-axis images, and image reconstruction and processing were implemented using the Gadgetron software framework with the previously developed convolutional neural network for labeling landmarks on CMR images (28).

Diastolic function was measured from mitral in-flow velocity-encoded images (25). Regions of interest were manually drawn on one frame to encircle the entire cross-section of MV leaflets and propagated using a semiautomated contouring mode in cvi42 software (Circle Cardiovascular Imaging), yielding velocity versus time graphs characterizing diastolic E and A waves. The mean of

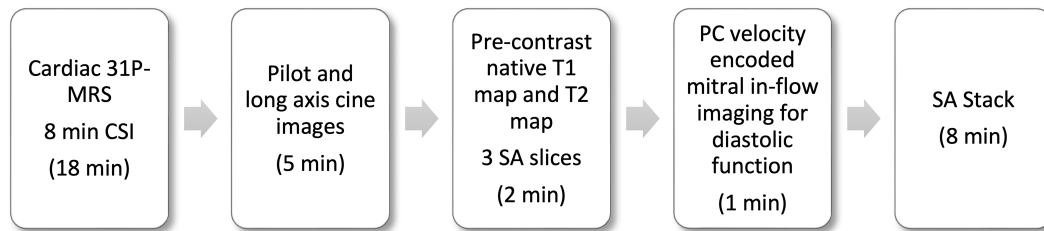

**Figure 2**— $^{31}\text{P}$ -MRS and CMR protocol used (3 T, cine imaging, velocity-encoded mitral in-flow imaging, T1 and T2 mapping). CSI, chemical shift imaging; PC, phase contrast; SA, short axis. After the acquisition of cardiac  $^{31}\text{P}$ -MRS, using the same scanner after a coil change, the CMR imaging was performed. The CMR protocol included balanced steady-state free precession (bSSFP) localizers in three orthogonal planes, anatomic imaging with half-Fourier acquisition single-shot turbo spin-echo in different orthogonal planes, long- and short-axis, bSSFP, retrospectively gated breath-held cines for the assessment of ventricular function. Phase-contrast velocity-encoded mapping for the mitral in-flow imaging was performed for diastolic assessments of mitral-inflow E/A ratio and DT. Native T1 mapping and T2 mapping images were acquired for myocardial tissue characterization.

maximum velocity obtained for MV was recorded. The deceleration time (DT) was calculated as previously described from the same images (25).

Native T1 and T2 maps were analyzed using cvi42 software (Circle Cardiovascular Imaging) and were measured for each of the 16 segments using the American Heart Association classification.

### Statistical Analysis

Statistical analysis was performed using SPSS statistics, version 26.0 (IBM). Categorical data were compared with the Pearson  $\chi^2$  test. Continuous variables are presented as mean  $\pm$  SD and were checked for normality using the Shapiro-Wilk test. Comparisons of all CMR and biochemistry data were performed with two-tailed paired *t* test or Mann Whitney *U* test, as appropriate.  $P \leq 0.05$  was considered statistically significant. Bivariate correlations were performed using the Pearson or Spearman method, as appropriate.

A priori sample-size calculations were performed before the study; these showed that to detect a 20% difference in the mean myocardial PCr/ATP ratio between the two groups, a minimum of 26 participants per group would be needed (with 80% power at  $\alpha = 0.05$ ). These recruitment goals were exceeded in the study.

In this study, prespecified hypotheses were tested on three variables: myocardial PCr/ATP ratio, left ventricular (LV) mass, and GLS. Linear regression models were used to test for associations among these three variables and systolic and diastolic BPs, BMI, plasma triglyceride concentrations, and HbA<sub>1c</sub>.

## RESULTS

### Study Population

Demographic, clinical, and biochemical data of the two study groups are shown in Table 1. A total of 38 HP women and 30 participants with GDM were prospectively recruited. Maternal age, gestational age, and ethnicity distribution were similar between the groups. Ethnicity distribution ( $n = 33$  of 38 participants in the HP arm were Caucasian,  $n = 3$  Pakistani,  $n = 1$  Chinese, and  $n = 1$  Black; in the GDM group,  $n = 26$  of 30 participants were Caucasian,  $n = 1$  Indian,  $n = 2$  Chinese, and  $n = 1$  Black) was broadly in line with the local population demographics. Both groups included similar numbers of participants classified as at advanced maternal age ( $>35$  years old) (HP versus GDM: 6 vs. 4;  $P = 0.8$ ). None of the participants in either group had a family history of T2D.

Diagnosis of GDM was confirmed by OGTT in all participants with GDM, per clinical guidelines (29). On the day of OGTT, the mean fasting glucose in the GDM group was  $5.1 \pm 0.7$  mmol/L and the mean 2-h plasma glucose was  $9.0 \pm 1.4$  mmol/L. Of the participants with GDM, 12 (40%) were receiving metformin treatment and 4 (13%) were receiving additional insulin treatment for glycemic control. The remaining 18 women with GDM received dietary advice alone.

The women with GDM had higher BMI than those in the HP arm, both at the booking antenatal clinic visit and at the third trimester CMR-scan visit. However, both groups had similar gestational weight gain (Table 1). There was no significant difference in resting

heart rate between the two groups, but the GDM group had higher resting systolic and diastolic BP measurements both at the booking antenatal clinic visit and at the third trimester CMR scan visit (Table 1). The plasma triglyceride, free fatty acid, ketone ( $\beta$ -hydroxybutyrate), and HbA<sub>1c</sub> levels were all significantly higher in the GDM group (Table 1). There was no significant difference in NT-proBNP levels between the two groups.

### Myocardial Energetics, Structure, and Function Comparisons

$^{31}\text{P}$ -MRS results for myocardial energetics and CMR results for biventricular volumes, systolic function, LV mass, diastolic function, and GLS are summarized in Table 2.

The women with GDM had significant reduction in myocardial PCr/ATP ratio (mean [95% CI], HP: 2.2 [2.1–2.4] vs. GDM: 1.9 [1.7–2.0];  $P \leq 0.0001$ ) (Fig. 3). This was accompanied by important structural and functional differences. The women with GDM had lower LV end-diastolic volumes (EDVs) indexed for body surface area (mean [95% CI], HP: 76 [72–80] mL/m<sup>2</sup> vs. GDM: 67 [63–71] mL/m<sup>2</sup>;  $P = 0.002$ ) but greater LV mass (mean [95% CI], HP: 90 [85–94] g vs. GDM: 103 [96–112] g;  $P = 0.001$ ) and greater LV mass over LV to EDV ratio, suggestive of increased concentricity of the LV (mean [95% CI], HP: 0.6 [0.6–0.7] g/mL vs. GDM: 0.8 [0.7–0.8] g/mL;  $P = 0.0001$ ) (Fig. 4). LV end-diastolic wall thickness was also greater in women with GDM (mean [95% CI], HP: 7.6 [7.2–8.0] mm vs. GDM: 9.5 [9.3–10.0] mm;  $P = 0.0001$ ). When adjusted for booking BMI and for gestational weight gain, the comparisons of myocardial

**Table 1—Clinical characteristics and the biochemistry**

| Variable                             | HP (n = 38)   | GDM (n = 30) | P value |
|--------------------------------------|---------------|--------------|---------|
| Age, years                           | 31 ± 4        | 31 ± 5       | 1       |
| Ethnicity, White, %                  | 87            | 87           | 1       |
| Gestational date at CMR, wk          | 30 ± 2        | 31 ± 2       | 0.2     |
| Booking BMI, kg/m <sup>2</sup>       | 25 ± 5        | 31 ± 5       | 0.0001  |
| BMI at scan visit, kg/m <sup>2</sup> | 27 ± 4        | 33 ± 5       | 0.0001  |
| Heart rate, bpm                      | 88 ± 12       | 91 ± 14      | 0.3     |
| Hip circumference, cm                | 104 ± 13      | 117 ± 16     | 0.004   |
| Waist circumference, cm              | 100 ± 11      | 110 ± 14     | 0.002   |
| Booking systolic BP, mmHg            | 113 ± 10      | 120 ± 9      | 0.004   |
| Systolic BP, mmHg                    | 115 ± 11      | 121 ± 13     | 0.04    |
| Booking diastolic BP, mmHg           | 69 ± 8        | 74 ± 8       | 0.01    |
| Diastolic BP, mmHg                   | 72 ± 7        | 76 ± 9       | 0.04    |
| <b>Biochemistry</b>                  |               |              |         |
| Hemoglobin, g/L                      | 121 ± 9       | 122 ± 9      | 0.7     |
| HDL, mmol/L                          | 2.2 ± 0.4     | 1.9 ± 0.4    | 0.003   |
| LDL, mmol/L                          | 3.6 ± 1.3     | 3.3 ± 1.2    | 0.3     |
| TG, mmol/L                           | 2.5 ± 1.0     | 3.1 ± 0.8    | 0.009   |
| Creatinine, μmol/L                   | 47 ± 7        | 46 ± 10      | 0.6     |
| eGFR, ml/min/1.73 m <sup>2</sup>     | 90 ± 0        | 89 ± 3       | 0.04    |
| Urine alb to creatinine ratio        | 1.3 ± 1.3     | 1.9 ± 3.2    | 0.3     |
| HbA <sub>1c</sub> , mmol/mol         | 31 ± 3        | 33 ± 3       | 0.008   |
| Glucose, mmol/L                      | 5.2 ± 1.1     | 6.6 ± 7.1    | 0.2     |
| NT-proBNP, ng/L                      | 55 ± 32       | 46 ± 17      | 0.2     |
| FFA, mmol/L                          | 0.3 ± 0.1     | 0.4 ± 0.2    | 0.009   |
| β-hydroxybutyrate, mmol/L            | 0.1 ± 0.07    | 0.2 ± 0.2    | 0.006   |
| <b>Pregnancy-specific parameters</b> |               |              |         |
| Gestational weight gain, kg          | 8.9 ± 4.9     | 7.9 ± 4.4    | 0.38    |
| Birth weight, g                      | 3,429 ± 1,166 | 3,196 ± 667  | 0.04    |
| Birth weight for gestational age, %  | 42 ± 25       | 41 ± 26      | 0.8     |
| Female sex, %                        | 29            | 47           | 0.1     |

Values are means (SD) or median (interquartile range) for continuous variables and *n* (%) for categorical variables. Alb, albumin; FFA, free fatty acid; TG, triglyceride.

energetics, GLS, and cardiac concentricity between the two groups remained statistically significant (Fig. 4).

Although the LV ejection fraction was similar between the two groups, the LV GLS was significantly lower in the GDM group (mean [95% CI], HP: −20% [18–21%] vs. GDM: −18% [17–19%]; *P* = 0.008) (Fig. 5). Both pregnancy groups exhibited similar mitral inflow E-wave to A-wave (E/A) ratio and DT measured from mitral in-flow velocity-encoded images. Similar to LV EDV differences, the right ventricular (RV) EDV was smaller in the GDM group (mean [95% CI], HP: 85 [79–88] mL vs. GDM: 77 [67–80] mL; *P* = 0.04). There were no significant differences in RV ejection fraction between the two groups. There were no significant differences in left atrial volumes or function between the groups.

### Myocardial Tissue Characteristics

Although, numerically, the HP group had higher myocardial native T1 measurements than the GDM group, this difference did not reach statistical significance (HP: 1,325 ± 34 ms vs. GDM: 1,308 ± 38 ms; *P* = 0.05). There was no significant difference between the groups on T2 mapping measurements (HP: 40 ± 3 ms vs. GDM: 39 ± 3 ms; *P* = 0.2).

### Birth Weight, Birth Weight for Gestational Age, and Sex Comparisons

A subtle difference in birth weight was detected between the babies born to women in the HP and the GDM groups, with a higher birth weight in the HP group. Birth weight for gestational age was slightly lower in the GDM group (HP: 42 ± 25 vs. GDM: 41 ± 26; *P* = 0.8).

There were no differences in sex distribution of the babies.

### Correlations

There was significant correlation between the PCr/ATP ratio and LV mass (*r* = −0.37; *P* = 0.005). Multilinear regression showed that LV mass was independently associated with systolic BP and BMI (Table 3). There were no other significant bivariate correlations.

### CONCLUSIONS

In this prospective study, diagnosis of GDM was associated with subclinical alterations in cardiac energetics, structure, and function. Compared with age, gestational age- and ethnicity-matched women with an uncomplicated HP, young women with GDM displayed enhanced LV concentricity with greater LV wall thickness and mass, and smaller LV chamber size. These structural alterations were accompanied by significant reductions in myocardial energetics and in LV GLS in the GDM group. These findings may aid our understanding of the long-term cardiovascular risks posed by GDM.

### Reductions in Myocardial Energetics in GDM

During HP, the maternal physiology adapts to compensate for many changes in energy demands. In our study, using <sup>31</sup>P-MRS, we show that despite their young age, women with obesity and GDM display significant reductions in myocardial energetics, whereas in women with HP, these were maintained at normal levels. This finding suggests insufficient adaptation of the maternal myocardial metabolic machinery to cope with the challenging metabolic and hemodynamic demands of the pregnancy in the GDM group.

The heart has a very high energy demand while having minimal energy-storing capacity (30). Efficient matching of energy supply to demand in the heart, therefore, is essential for maintaining cardiac function. Compromised cardiac energy production is an important contributor to most forms of heart disease (14,31–33), and myocardial metabolic insult of a pregnancy with GDM may be a potential driver of the enhanced CVD risk. Manipulating myocardial energy metabolism, therefore, may be a



**Table 2—CMR and <sup>31</sup>P-MRS findings**

| Variable                                     | HP (n = 38) | GDM (n = 30) | P value | Adjusted P value for BMI | Adjusted P value for gestational weight gain |
|----------------------------------------------|-------------|--------------|---------|--------------------------|----------------------------------------------|
| <b>LV structural parameters</b>              |             |              |         |                          |                                              |
| EDV, mL                                      | 143 ± 23    | 136 ± 24     | 0.2     | 0.2                      | 0.2                                          |
| EDV index, mL/m <sup>2</sup>                 | 76 ± 12     | 67 ± 11      | 0.002   | 0.003                    | 0.03                                         |
| End systolic volume, mL                      | 59 ± 12     | 59 ± 14      | 1       | 1                        | 1                                            |
| End systolic volume index, mL/m <sup>2</sup> | 31 ± 6      | 29 ± 7       | 0.2     | 0.2                      | 0.2                                          |
| Stroke volume, mL                            | 84 ± 15     | 77 ± 13      | 0.04    | 0.02                     | 0.1                                          |
| Stroke volume index, mL/m <sup>2</sup>       | 49 ± 12     | 46 ± 8       | 0.2     | 0.2                      | 0.2                                          |
| Ejection fraction, %                         | 59 ± 4      | 57 ± 6       | 0.05    | 0.05                     | 0.05                                         |
| Mass, g                                      | 90 ± 13     | 103 ± 18     | 0.001   | 0.009                    | <0.001                                       |
| Mass index, g/m <sup>2</sup>                 | 46 ± 8      | 50 ± 7       | 0.3     | 0.3                      | 0.03                                         |
| LV mass/LV EDV, g/mL                         | 0.6 ± 0.1   | 0.8 ± 0.2    | 0.0007  | <0.001                   | 0.004                                        |
| Wall thickness, mm                           | 7.6 ± 1.2   | 9.5 ± 1.2    | 0.0001  | <0.001                   | <0.001                                       |
| <b>Myocardial energetics</b>                 |             |              |         |                          |                                              |
| PCr/ATP ratio                                | 2.2 ± 0.3   | 1.9 ± 0.4    | <0.0001 | 0.001                    | 0.003                                        |
| <b>Functional parameters</b>                 |             |              |         |                          |                                              |
| LV ejection fraction, %                      | 59 ± 4      | 57 ± 6       | 0.05    | 0.05                     | 0.05                                         |
| RV ejection fraction, %                      | 55 ± 6      | 54 ± 7       | 0.5     | 0.5                      | 0.5                                          |
| GLS, %                                       | −20 ± 3     | −18 ± 3      | 0.008   | <0.001                   | 0.002                                        |
| MAPSE, mm                                    | 14 ± 3      | 14 ± 2       | 1       | 1                        | 1                                            |
| E/A ratio                                    | 1.7 ± 0.4   | 1.7 ± 0.4    | 1       | 1                        | 1                                            |
| DT, ms                                       | 152 ± 38    | 179 ± 75     | 0.06    | 0.06                     | 0.06                                         |

Values are means (SD) or median (interquartile range) for continuous variables and *n* (%) for categorical variables. LA, left atrium; MAPSE, mitral annular plane systolic excursion.

promising strategy to improve cardiovascular outcomes in women with GDM.

The metabolic and hemodynamic challenges of pregnancy were augmented in the GDM group, with higher plasma HbA<sub>1c</sub>, triglyceride, ketone body, and free fatty acid levels; lower HDL levels; and higher resting BP measurements in the GDM group compared with the HP cohort. Given the multitude of metabolic and hemodynamic alterations in the GDM group, the driving factor for this energetic impairment is likely to be multifactorial.

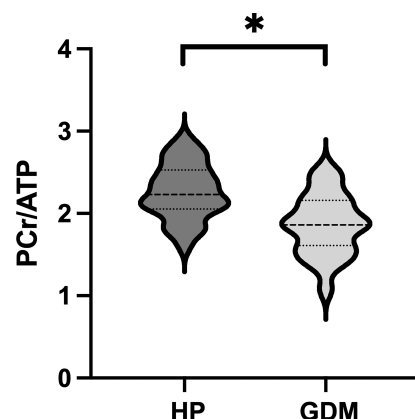

**Figure 3**—Violin plots demonstrating the differences in PCr/ATP ratio between the participants with GDM and participants with HP.

Consistent with previous reports (34), in our study, women with GDM had higher booking BMI, which is a close estimate of prepregnancy weight, but the gestational weight gain was similar between the groups in this study. Being overweight or obese before pregnancy is considered the most important GDM risk factor (34). Our results add more evidence for increased body weight as an integrating determinant of maternal myocardial alterations in women with GDM. In our study, BMI was associated with myocardial PCr/ATP ratio, whereas diabetes-specific parameters such as HbA<sub>1c</sub> and plasma glucose concentrations did not correlate with cardiac parameters. In a similar pattern as in this study, in previous studies of established T2D cohorts, we have not detected correlations of HbA<sub>1c</sub> or plasma glucose with cardiac parameters, including energetics, cardiac structural changes, or cardiac contractile function measured by GLS (33,35). These findings are in keeping with the long-standing existing evidence that despite the strict glycemic control in patients with T2D, the excess risk of heart failure persists (36).

Reductions in myocardial PCr/ATP ratio have been demonstrated in chronic obesity (37) and in overt T2D (33).

Numerous previous studies have reported an increased risk of GDM among women who are overweight or obese compared with women with normal body weight (34). Therefore, it is clear the GDM risk is, in a big part, driven by the obesity epidemic, and maintaining a healthy body weight throughout the reproductive life would likely confer great benefits in reducing the risk of GDM. In this study, although the comparisons of principal findings between the two groups remained statistically significant even when adjusted for booking BMI and for gestational weight gain, the potential impact of prior overweight status on the findings cannot be ruled out by our study design.

However, it is not possible to draw conclusions from comparison with existing literature on cardiac studies in overweight cohorts, because of their significant methodological differences from this study (38,39). The existing reports of cardiac assessments in overweight cohorts included older adults, with a significant proportion of male participants and significantly higher BMI in the obesity cohort and a lower BMI in the control group than in our study—all of which are likely to have a significant impact on the cardiac findings. Despite

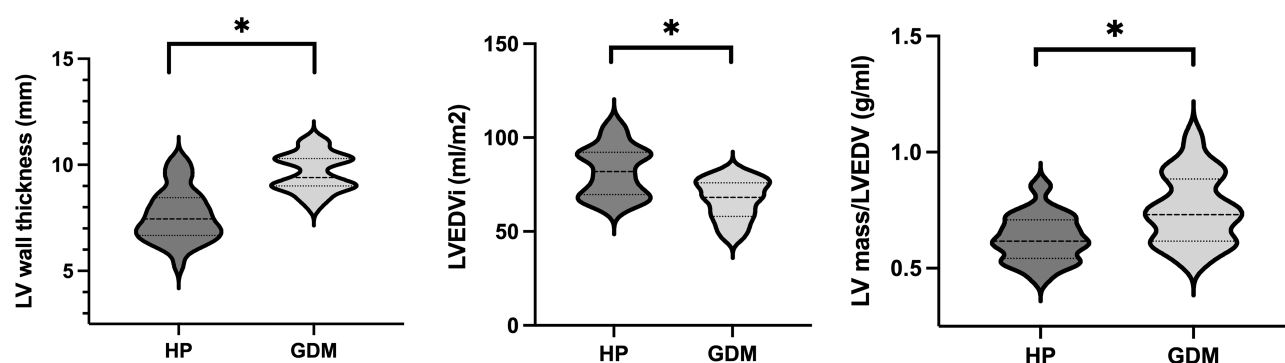

**Figure 4**—Violin plots demonstrating the differences in LV end diastolic wall thickness, LV end diastolic volumes indexed for the body surface area (LVEDVi), and LV mass over LV end diastolic volume as a measure of LV concentricity between the participants with GDM and participants with HP.

the significantly younger age and lower BMI of our participants, we have detected significant reductions in energetics and cardiac contractile function in the GDM cohort, which likely suggest at least an additive impact of GDM and overweight status on the cardiac findings.

With regard to the long-term cardiovascular outcomes, a higher incidence of CVD was found in women with both a history of GDM and obesity (HR 1.76 [95% CI 1.59–1.95]) compared with women with a history of GDM alone (HR 1.43 [95% CI 1.38–1.49]), with a multiplicative interaction between GDM and obesity (7).

#### Cardiac Structural and Functional Changes in GDM

The enhanced cardiac concentricity revealed in our study may be an important component of the worsened cardiovascular outcomes in women with GDM in the longer term. Although initially an adaptive response for maintaining cardiac

output, sustained hypertrophic growth of the myocardium induced by pathological stimuli is a leading predictor for the development of heart failure and for cardiovascular death (40).

To our knowledge, our study is the only study of women with GDM to use CMR and <sup>31</sup>P-MRS. Consistent with our findings, using echocardiography, two prospective studies reported increased LV mass and abnormalities in GLS in women with GDM (41,42). Moreover, in a multicenter, longitudinal, observational CARDIA (Coronary Artery Risk Development in Young Adults) study, 609 women (*n* = 64 with GDM) were followed with echocardiograms over 20 years (43). After adjusting for potential confounders, including BMI, BP, lipid levels,

and incident T2D, women with prior GDM had higher LV mass index as well as systolic dysfunction at the end of the study.

Although these observational clinical studies, including our own study, cannot prove causality, using a GDM model of female rats (HIP rats), Verma et al. (44) reported supportive evidence of a causal relationship between pathological cardiac hypertrophy and GDM. Their results implicated altered calcium handling as the central mechanism that underlies the maternal myocardial hypertrophic response in GDM, leading to activation of the calcineurin-dependent transcriptional pathway for cardiac hypertrophy (nuclear factor of activated T-cell signaling), as well as calcium/calmodulin-

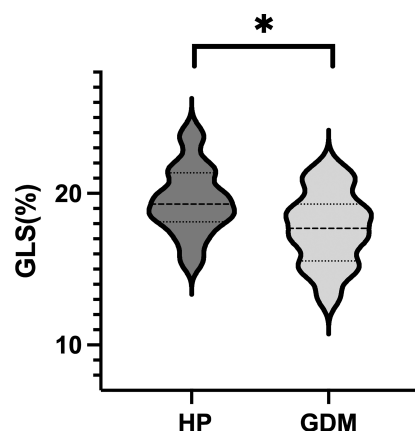

**Figure 5**—Violin plots demonstrating the differences in LV GLS between participants with GDM and participants with HP.

**Table 3**—Linear regression model for dependent variables PCr/ATP ratio, LV mass, and GLS

|                      | $\beta$ | SE    | 95% CI        | P value |
|----------------------|---------|-------|---------------|---------|
| <b>PCr/ATP ratio</b> |         |       |               |         |
| Constant             | 4.85    | 1.99  | 0.75–8.94     | 0.02    |
| Systolic BP          | −0.021  | 0.018 | −0.060, 0.016 | 0.25    |
| Diastolic BP         | 0.021   | 0.028 | −0.037, 0.08  | 0.46    |
| HbA <sub>1c</sub>    | −0.004  | 0.046 | −0.1, 0.09    | 0.92    |
| Triglyceride         | −0.162  | 0.165 | −0.5, 0.18    | 0.33    |
| BMI                  | −0.368  | 0.026 | −0.09, 0.02   | 0.17    |
| <b>LV mass</b>       |         |       |               |         |
| Constant             | 37.60   | 54.36 | −72.65, 147.8 | 0.49    |
| Systolic BP          | −0.89   | 0.41  | −1.72, −0.07  | 0.03    |
| Diastolic BP         | 1.33    | 0.67  | −0.04, 2.70   | 0.05    |
| HbA <sub>1c</sub>    | 0.75    | 1.33  | −1.95, 3.46   | 0.57    |
| Triglyceride         | −2.7    | 4.68  | −12.19, 6.78  | 0.56    |
| BMI                  | 1.61    | 0.75  | −0.09, 3.12   | 0.04    |
| <b>GLS</b>           |         |       |               |         |
| Constant             | 32.81   | 7.24  | 18.10–47.53   | <0.0001 |
| Systolic BP          | −0.014  | 0.053 | −0.124, 0.095 | 0.7     |
| Diastolic BP         | −0.10   | 0.09  | −0.29, 0.088  | 0.28    |
| HbA <sub>1c</sub>    | −0.25   | 0.18  | −0.61, 0.12   | 0.17    |
| Triglyceride         | 1.08    | 0.64  | −0.23, 2.39   | 0.1     |
| BMI                  | −0.02   | 0.1   | −0.22, 0.18   | 0.82    |

dependent kinase II/class IIa histone deacetylase (CaMKII/HDAC) signaling (the CaMKII/HDAC pathway), leading to expression of prohypertrophic genes (44,45).

### Birth Weight for Gestational Age

Contrary to expectation, the birth weight for gestational age was slightly lower in the GDM group, which is likely due to careful monitoring and controlled GDM status of the participants. Larger population studies suggest an opposite finding, with higher birth weight observed in GDM (46).

### Future Perspectives

Although much is known about GDM pathophysiology, molecular understanding of GDM has not yet been translated into efficacious therapies (9). The current treatment of GDM focuses on optimizing glycemic control. When this is not achieved despite lifestyle and dietary advice, treatment with antihyperglycemic medication is indicated.

However, because the cardiovascular risk associated with GDM does not diminish by attaining normoglycemia, there is a clear and pressing need for novel strategies specifically aiming to improve cardiovascular outcomes for women with GDM. If larger longitudinal studies confirm a consistent association between the cardiac alterations revealed in this study in women with GDM and higher rates of adverse maternal and fetal outcomes, the early detection of these adverse subclinical myocardial alterations might offer the opportunity of better stratifying women at risk for perinatal complications, as well as future CVD (13).

Although excessive gestational weight gain was shown to increase adverse pregnancy outcomes, prepregnancy maternal obesity might be a more important factor in driving these adverse outcomes (47). Supporting this notion, in this study, we did not detect significant differences in gestational weight gain between the two cohorts, although the booking BMI was significantly higher in the GDM group. Raising awareness with adequate prepregnancy counseling through public health initiatives to achieve ideal body weight in women who plan pregnancy might lead to improved maternal and offspring outcomes.

### Limitations

This study is limited by a relatively small sample size, in line with its proof-of-principle nature. Although, to our knowledge, there are no prior studies evaluating nulliparous overweight or obese women of similar age to our study population, because the scans were performed during pregnancy, once a diagnosis of GDM was established, we cannot reliably rule out that these cardiac alterations were not present prepregnancy, reflecting underlying preexisting cardiometabolic risk factors in women with GDM. Moreover, longitudinal assessments are needed for the evaluation of reversibility after pregnancy of the maternal cardiac changes detected in this study.

Without an additional control group of women with obesity but without GDM, we cannot reliably exclude that the changes demonstrated in this study are driven by the GDM only or obesity only, or a combination of both conditions. Studies are needed to address this.

Although studies confirm that non-contrast MRI does not harm the fetus when performed at any stage of pregnancy (19), an increased risk of neonatal death or stillbirth with gadolinium-based contrast exposure has been reported (21). As a result, only noncontrast scans were performed in our study.

### Conclusion

This study demonstrates that young primiparous women with obesity and GDM manifest impaired myocardial contractility and significantly greater LV mass associated with impaired myocardial energetics in late pregnancy compared with lean women with HP. These findings may aid our understanding of the long-term cardiovascular risks posed by GDM.

**Funding.** This project was funded in part by the Women as One escalator award in research to E.L. and by a Wellcome Trust [221690/Z/20/Z] Clinical Career development fellowship to E.L. A.C. receives support from the British Heart Foundation (grant FS/CRTF/20/24003). N.J. receives support from a Diabetes UK PhD studentship (grant 18/0005908). C.T.R. acknowledges support from the National Institute for Health and Care Research Cambridge Biomedical Research Centre (grant BRC-1215-20014) and the Wellcome Trust and Royal Society (grant 098436/Z/12/B). L.V. is funded by a Sir Henry Dale Fellowship supported jointly by the Wellcome Trust and the Royal Society (grant 221805/Z/20/Z) and the Slovak Grant Agencies Vedecká grantová agentúra

(grant 2/0003/20) and Agentúra na podporu výskumu a vývoja (grant 19-0032).

**Duality of Interest.** For the purpose of open access, the author has applied a CC BY public copyright license to any Author Accepted Manuscript version arising from this submission. The funding bodies played no role in the design of the study and collection, analysis, and interpretation of data and in writing the manuscript. No potential conflicts of interest relevant to this article were reported.

**Author Contributions.** E.L. contributed to study conception, design, and setup; data acquisition, analysis, and interpretation; drafting and revision of the manuscript; and study supervision. S.T. contributed to participant recruitment; data acquisition, analysis, and interpretation; and drafting and revision of the manuscript. F.A. contributed to participant recruitment. E.S. and T.E. contributed to study conception, design, and setup, and drafting of the manuscript. S.P. and J.P.G. contributed to study supervision, data interpretation, and manuscript revision. R.C., M.R.D., D.E.N., O.J.R., C.B.-D., and K.F. contributed to study design, set-up, and manuscript revision. L.V., D.J.T., C.T.R., H.X., and P.K. provided essential support for the scan sequences and manuscript revision. A.C. and N.J. contributed to data analysis, interpretation and manuscript revision. S.D., P.S., and K.M. contributed to manuscript revision and data interpretation. S.T. is the guarantor of this work and as such had full access to all the data in the study and takes responsibility for the integrity of the data and the accuracy of the data analysis.

### References

- Metzger BE, Lowe LP, Dyer AR, et al.; HAPO Study Cooperative Research Group. Hyperglycemia and adverse pregnancy outcomes. *N Engl J Med* 2008;358:1991–2002
- McDonald SD, Malinowski A, Zhou Q, Yusuf S, Devereaux PJ. Cardiovascular sequelae of preeclampsia/eclampsia: a systematic review and meta-analyses. *Am Heart J* 2008;156:918–930
- Zhang C, Ning Y. Effect of dietary and lifestyle factors on the risk of gestational diabetes: review of epidemiologic evidence. *Am J Clin Nutr* 2011;94(Suppl.):1975S–1979S
- Kramer CK, Campbell S, Retnakaran R. Gestational diabetes and the risk of cardiovascular disease in women: a systematic review and meta-analysis. *Diabetologia* 2019;62:905–914
- Okoth K, Chandan JS, Marshall T, et al. Association between the reproductive health of young women and cardiovascular disease in later life: umbrella review. *BMJ* 2020;371:m3502
- Li J, Song C, Li C, Liu P, Sun Z, Yang X. Increased risk of cardiovascular disease in women with prior gestational diabetes: a systematic review and meta-analysis. *Diabetes Res Clin Pract* 2018;140:324–338
- Yu Y, Soohoo M, Sørensen HT, Li J, Arah OA. Gestational diabetes mellitus and the risks of overall and type-specific cardiovascular diseases: a population- and sibling-matched cohort study. *Diabetes Care* 2022;45:151–159
- Bellamy L, Casas J-P, Hingorani AD, Williams D. Type 2 diabetes mellitus after gestational diabetes: a systematic review and meta-analysis. *Lancet* 2009;373:1773–1779



9. McIntyre HD. Discovery, knowledge, and action—diabetes in pregnancy across the translational spectrum: the 2016 Norbert Freinkel Award Lecture. *Diabetes Care* 2018;41:227–232
10. Hauspurg A, Ying W, Hubel CA, Michos ED, Ouyang P. Adverse pregnancy outcomes and future maternal cardiovascular disease. *Clin Cardiol* 2018;41:239–246
11. Mecacci F, Ottanelli S, Vannuccini S, et al. Maternal hemodynamic changes in gestational diabetes: a prospective case–control study. *Arch Gynecol Obstet* 2022;306:357–363
12. McIntyre HD, Catalano P, Zhang C, Desoye G, Mathiesen ER, Damm P. Gestational diabetes mellitus. *Nat Rev Dis Primers* 2019;5:47
13. Parikh NI, Gonzalez JM, Anderson CAM, et al.; American Heart Association Council on Epidemiology and Prevention; Council on Arteriosclerosis, Thrombosis and Vascular Biology; Council on Cardiovascular and Stroke Nursing; and the Stroke Council. Adverse pregnancy outcomes and cardiovascular disease risk: unique opportunities for cardiovascular disease prevention in women: a scientific statement from the American Heart Association. *Circulation* 2021;143:e902–e916
14. Lopaschuk GD, Karwi QG, Tian R, Wende AR, Abel ED. Cardiac energy metabolism in heart failure. *Circ Res* 2021;128:1487–1513
15. Neubauer S. The failing heart—an engine out of fuel. *N Engl J Med* 2007;356:1140–1151
16. Neubauer S, Horn M, Cramer M, et al. Myocardial phosphocreatine-to-ATP ratio is a predictor of mortality in patients with dilated cardiomyopathy. *Circulation* 1997;96:2190–2196
17. Ingwall JS. Energy metabolism in heart failure and remodelling. *Cardiovasc Res* 2009;81:412–419
18. Salerno M, Sharif B, Arheden H, et al. Recent advances in cardiovascular magnetic resonance: techniques and applications. *Circ Cardiovasc Imaging* 2017;10:e003951
19. Strizek B, Jani JC, Mucyo E, et al. Safety of MR imaging at 1.5 T in fetuses: a retrospective case-control study of birth weights and the effects of acoustic noise. *Radiology* 2015;275:530–537
20. Herrey AS, Francis JM, Hughes M, Ntusi NAB. Cardiovascular magnetic resonance can be undertaken in pregnancy and guide clinical decision-making in this patient population. *Eur Heart J Cardiovasc Imaging* 2019;20:291–297
21. Ray JG, Vermeulen MJ, Bharatha A, Montanera WJ, Park AL. Association between MRI exposure during pregnancy and fetal and childhood outcomes. *JAMA* 2016;316:952–961
22. Kok RD, de Vries MM, Heerschap A, van den Berg PP. Absence of harmful effects of magnetic resonance exposure at 1.5 T in utero during the third trimester of pregnancy: a follow-up study. *Magn Reson Imaging* 2004;22:851–854
23. Diabetes in pregnancy: management from preconception to the postnatal period, 2020. Available from <https://www.nice.org.uk/guidance/ng3>. Accessed 6 April 2022
24. Thirunavukarasu S, Jex N, Chowdhary A, et al. Empagliflozin treatment is associated with improvements in cardiac energetics and function and reductions in myocardial cellular volume in patients with type 2 diabetes. *Diabetes* 2021;70:2810–2822
25. Rathi VK, Doyle M, Yamrozik J, et al. Routine evaluation of left ventricular diastolic function by cardiovascular magnetic resonance: a practical approach. *J Cardiovasc Magn Reson* 2008;10:36
26. Giri S, Chung Y-C, Merchant A, et al. T2 quantification for improved detection of myocardial edema. *J Cardiovasc Magn Reson* 2009;11:56
27. Purvis LAB, Clarke WT, Biasiolli L, Valković L, Robson MD, Rodgers CT. OXSA: an open-source magnetic resonance spectroscopy analysis toolbox in MATLAB. *PLoS One* 2017;12:e0185356
28. Xue H, Artico J, Fontana M, Moon JC, Davies RH, Kellman P. Landmark detection in cardiac MRI by using a convolutional neural network. *Radiol Artif Intell* 2021;3:e200197
29. American Diabetes Association. 13. Management of diabetes in pregnancy: *Standards of Medical Care in Diabetes-2018*. *Diabetes Care* 2018;41(Suppl. 1):S137–S143
30. Lopaschuk GD, Ussher JR, Folmes CDL, Jaswal JS, Stanley WC. Myocardial fatty acid metabolism in health and disease. *Physiol Rev* 2010;90:207–258
31. Burrage MK, Hundertmark M, Valković L, et al. Energetic basis for exercise-induced pulmonary congestion in heart failure with preserved ejection fraction. *Circulation* 2021;144:1664–1678
32. Rayner JJ, Peterzan MA, Clarke WT, Rodgers CT, Neubauer S, Rider OJ. Obesity modifies the energetic phenotype of dilated cardiomyopathy. *Eur Heart J* 2021;43:868–877
33. Levelt E, Rodgers CT, Clarke WT, et al. Cardiac energetics, oxygenation, and perfusion during increased workload in patients with type 2 diabetes mellitus. *Eur Heart J* 2016;37:3461–3469
34. Chu SY, Callaghan WM, Kim SY, et al. Maternal obesity and risk of gestational diabetes mellitus. *Diabetes Care* 2007;30:2070–2076
35. Levelt E, Mahmood M, Piechnik SK, et al. Relationship between left ventricular structural and metabolic remodelling in type 2 diabetes mellitus. *Diabetes* 2016;65:44–52
36. Rawshani A, Rawshani A, Franzén S, et al. Risk factors, mortality, and cardiovascular outcomes in patients with type 2 diabetes. *N Engl J Med* 2018;379:633–644
37. Rider OJ, Francis JM, Ali MK, et al. Effects of catecholamine stress on diastolic function and myocardial energetics in obesity. *Circulation* 2012;125:1511–1519
38. Rider OJ, Francis JM, Tyler D, Byrne J, Clarke K, Neubauer S. Effects of weight loss on myocardial energetics and diastolic function in obesity. *Int J Cardiovasc Imaging* 2013;29:1043–1050
39. Rayner JJ, Peterzan MA, Watson WD, et al. Myocardial energetics in obesity: enhanced ATP delivery through creatine kinase with blunted stress response. *Circulation* 2020;141:1152–1163
40. Levy D, Garrison RJ, Savage DD, Kannel WB, Castelli WP. Prognostic implications of echocardiographically determined left ventricular mass in the Framingham Heart Study. *N Engl J Med* 1990;322:1561–1566
41. Oliveira AP, Calderon IM, Costa RA, Roscani MG, Magalhães CG, Borges VT. Assessment of structural cardiac abnormalities and diastolic function in women with gestational diabetes mellitus. *Diab Vasc Dis Res* 2015;12:175–180
42. Buddeberg BS, Sharma R, O'Driscoll JM, Kaelin Agten A, Khalil A, Thilaganathan B. Impact of gestational diabetes mellitus on maternal cardiac adaptation to pregnancy. *Ultrasound Obstet Gynecol* 2020;56:240–246
43. Appiah D, Schreiner PJ, Gunderson EP, et al. Association of gestational diabetes mellitus with left ventricular structure and function: the CARDIA Study. *Diabetes Care* 2016;39:400–407
44. Verma N, Srodulski S, Velmurugan S, et al. Gestational diabetes triggers postpartum cardiac hypertrophy via activation of calcineurin/NFAT signaling. *Sci Rep* 2021;11:20926
45. Backs J, Song K, Bezprozvannaya S, Chang S, Olson EN. CaM kinase II selectively signals to histone deacetylase 4 during cardiomyocyte hypertrophy. *J Clin Invest* 2006;116:1853–1864
46. Yang Y, Wang Z, Mo M, et al. The association of gestational diabetes mellitus with fetal birth weight. *J Diabetes Complications* 2018;32:635–642
47. Catalano PM. Reassessing strategies to improve pregnancy outcomes in overweight and obese women. *Lancet Diabetes Endocrinol* 2019;7:2–3
